## *Human induced pluripotent stem cell-derived vessels as dynamic atherosclerosis model on a chip*

Mallone A. <sup>1 \*</sup>, Gericke C. <sup>2</sup>, Hosseini V. <sup>3,4,5</sup>, Chahbi K. <sup>6</sup>, Haenseler W. <sup>7,8</sup>, Emmert M. Y. <sup>9,10,11</sup>, von Eckardstein A. <sup>12</sup>, Walther J. H. <sup>13,14</sup>, Vogel V. <sup>3</sup>, Weber, B. <sup>1,15 #</sup>, Hoerstrup, S. P. <sup>1,9,10 #</sup>

- 1 Laboratory of Tissue Engineering and Disease Modeling, Institute for Regenerative Medicine, University of Zurich, Switzerland
- 2 Laboratory of Immunology of Neurodegeneration, Institute for Regenerative Medicine, University of Zurich, Switzerland.
- 3 Laboratory of Applied Mechanobiology, Institute for Translational Medicine, Department of Health Sciences and Technology, ETH Zurich, Switzerland.
- 4 Center for Minimally Invasive Therapeutics (CMIT), California nanoSystems Institute, UCLA, Los Angeles, California, USA
- 5 Terasaki Institute for Biomedical Innovation, Los Angeles, California, USA
- 6 Department of Physics and Engineering, University of Strasbourg, France
- 7 Laboratory of Systems and Cell Biology of Neurodegeneration, Institute for Regenerative Medicine, University of Zurich, Switzerland
- 8 Institute of Molecular Systems Biology, ETH Zurich, Switzerland
- 9 Laboratory of Tissue Engineering and Organoid Technologies, Institute for Regenerative Medicine, University of Zurich, Switzerland
- 10 Wyss Translational Center Zurich, University of Zurich and ETH Zurich, Zurich, Switzerland
- 11 Department of Cardiothoracic and Vascular Surgery, German Heart Center Berlin, Berlin, Germany
- 12 Institute of Clinical Chemistry, University Hospital Zurich, Switzerland
- 13 Laboratory of Fluid Mechanics, Department of Mechanical Engineering, Technical University of Denmark, Denmark
- 14 Computational Science & Engineering Laboratory, ETH Zurich, Switzerland
- 15 Disease Modelling and Organoid Technology (DMOT) Research Group, Skin and Endothelium Research Division (SERD), Department of Dermatology, Medical University of Vienna, Austria

# These senior authors contributed equally to this work

\* Correspondence to  
anna.mallone@irem.uzh.ch, simon.hoerstrup@irem.uzh.ch

Abstract: 150 words

Main text: 3059 words (including: "Introduction", "Results", "Discussion"; excluding: Figure legends, "References", and "Materials and Methods")

Introduction: 452 words

Nr. Display elements: 4

Nr. References: 50

1 **Abstract**

2 Atherosclerosis is an arterial disease characterized by intravascular plaques. Disease hallmarks are  
3 vessel stenosis and hyperplasia, eventually escalating into plaque rupture and acute clinical  
4 presentations. Innate immune cells and local variations in hemodynamics are core players in the  
5 pathology, but their mutual relationship has never been investigated before due to the lack of modeling  
6 systems with adequate degree of complexity. Here, we combined computational fluid dynamics and  
7 tissue-engineering to achieve, for the first time *in vitro*, full atherosclerotic plaque development. Our  
8 model incorporates induced pluripotent stem cell-derived populations into small-caliber arteries that are  
9 cultured in atheroprone conditions. Using machine-learning-aided immunophenotyping, molecular and  
10 nanoprobe-based tensile analyses, we found that immune cells, extracellular matrix components and  
11 tensional state were comparable between *in vitro* and *ex vivo* human lesions. Our results provide further  
12 insights into the relation between hemodynamics and inflammation, introducing a versatile, scalable  
13 modeling tool to study atherosclerosis onset and progression.

## 1 Introduction

2 Atherosclerosis is an inflammatory disease of the arterial walls associated with life-threatening events  
3 such as myocardial infarction or stroke<sup>1,2</sup>. Disease hallmarks are fibrotic and fatty intra-vessel plaques,  
4 which cause abnormal vascular narrowing<sup>3</sup>. Plaque erosion followed by thrombus formation can lead  
5 to diverse outcomes depending on the downstream affected organ or vasculature<sup>4</sup>. Besides cases of  
6 ascertained genetic predisposition (i.e., familial hypercholesterolemia), multiple other factors can  
7 contribute to sporadic atherosclerosis. Among those, dyslipidemia with high blood levels of low-density  
8 lipoproteins (LDL) is the main risk factor, followed by chronic inflammation as well as age- and lifestyle-  
9 related comorbidities such as diabetes and hypertension<sup>5-8</sup>. Some of these conditions have been  
10 associated with systemic changes in blood hemodynamics, local alterations of the flow pattern (e.g.,  
11 vortexes and turbulences), and mechanical stress on the vessel walls<sup>9-11</sup>. As a result, flow variations  
12 promote local sub-luminal accumulation of LDL, providing the initial trigger for an inflammatory  
13 response<sup>12-16</sup>.

14  
15 *In vitro* models based on 2D-adherent cell cultures allowed a partial understanding of the activation  
16 mechanisms of endothelial, smooth muscle, and immune cells upon changes in flow dynamics and  
17 lipoproteins concentration<sup>8,17,18</sup>. Some 3D tissue-engineered tools (i.e., microtissues and organoids)  
18 attempted to mimic early and late stages of the disease<sup>19-21</sup> while animal models provided insights on  
19 plaque extracellular matrix (ECM) remodeling by inflammatory cells<sup>22-25</sup>. However, to the best of our  
20 knowledge, none of the above has been able to recapitulate the complex process of plaque build-up  
21 and ECM remodeling in a tissue-engineered replica of a human artery. Furthermore, it remains largely  
22 unknown how immune cells behave in regions of hemodynamic perturbation within a human, native-  
23 like vascular environment. Here, we hypothesized that it is possible to predict the location of regions of  
24 LDL accumulation regions in a vessel using *in silico* modeling, thus allowing for accurate prediction of  
25 potential plaque deposition areas. We further hypothesized that it is possible to accelerate plaque  
26 development *in vitro*, a long-lasting process in humans<sup>1</sup>, by introducing pathophysiological levels of  
27 circulating inflammatory cells, LDL, and altered flow patterns. In this work, we developed computational  
28 fluid dynamic (CFD) simulation of atherosclerotic plaque seeding in tissue-engineered vessels. This  
29 model allowed us to predict preferential intravascular hot spots of LDL accumulation and to measure

1 the sub-endothelial, potentially LDL-caused hindrance. To validate our predictions, we replicated such  
2 an environment *in vitro* by setting up a customized fluidic device hosting multiple 3D tissue-engineered  
3 small-caliber vascular grafts. The vessels were generated from human induced pluripotent stem cell  
4 (iPSC) – derived cells and were used to model atherosclerosis through daily exposure to atheroprone  
5 stimuli. Our work pioneers multiplexing approaches in vascular tissue-engineering and contributes to  
6 the optimization efforts in atherosclerosis modeling, serving as a starting point for other in-depth  
7 analyses focused on more specific stages of disease progression.



## 1 Results

2

### 3 1. iPSC-derived 3D human vessels display tissue architecture comparable to human native 4 vasculature.

5 To develop small-caliber arterial vessels, we first differentiated iPSCs into arterial endothelial cells  
6 (iECs) (Figure 1a-d, Supplementary Fig.1). We characterized the iECs using flow-cytometry and  
7 analyzed the flow data by unbiased machine-learning-guided approaches (here: t-distributed stochastic  
8 neighbor embedding, tSNE) and data-driven clustering algorithms (Figure 1b). We observed that iECs  
9 mainly consisted of CD31+/CD144+/CD68<sup>high</sup> cells (cluster 1, 92.45 %, Figure 1b, Supplementary  
10 Fig.1). The iECs phenotype was further confirmed via immunofluorescence analysis (IF) and by  
11 investigating their gene expression profile (Figure 1c, Supplementary Fig.1). iECs had no significant  
12 differences in expression levels of the key endothelial genes *VE-CADH* and *CD31* when compared to  
13 control endothelial cell lines such as human umbilical vein endothelial cells (HUVECs; *VE-CADH*  $p =$   
14  $0.45$ , *CD31*  $p = 0.09$ ) and human brain microvascular endothelial cells (HBMECs; *VE-CADH*  $p = 0.39$ ,  
15 *CD31*  $p = 0.07$ ). To test iECs functionality, we performed a tube formation assay, showing that iECs  
16 could sprout and generate new micro-vascular networks (Figure 1d). Next, we differentiated contractile  
17 smooth muscle cells (iSMCs) from syngeneic iPSCs (Figure 1e-k, Supplementary Fig.2). In IF  
18 experiments (Figure 1f-g, Supplementary Fig.2), iSMCs displayed typical smooth muscle markers such  
19 as smooth muscle myosin heavy chain (SMMHC), transgelin (SM22 $\alpha$ ) and alpha actin ( $\alpha$ SMA). We  
20 further confirmed the SMCs phenotype by looking at the gene expression profile (Figure 1d) where we  
21 observed the upregulation of the signature smooth muscle genes *aSMA* ( $p = 0.03$ ) and *SMTN* ( $p =$   
22  $0.03$ ). We investigated iSMCs functionality using a hydrogel contraction and a wound healing assay  
23 (Figure 1h-j). We confirmed the iSMCs contractile phenotype showing a behavior of iSMCs comparable  
24 to human umbilical vein myofibroblasts (HUVMs vs iSMCs ns:  $p > 0.05$ ). With the wound healing assay  
25 we further assessed the ability of iSMCs to convert to a disease-associated synthetic state and acquire  
26 migration skills, as described in literature<sup>17</sup>.

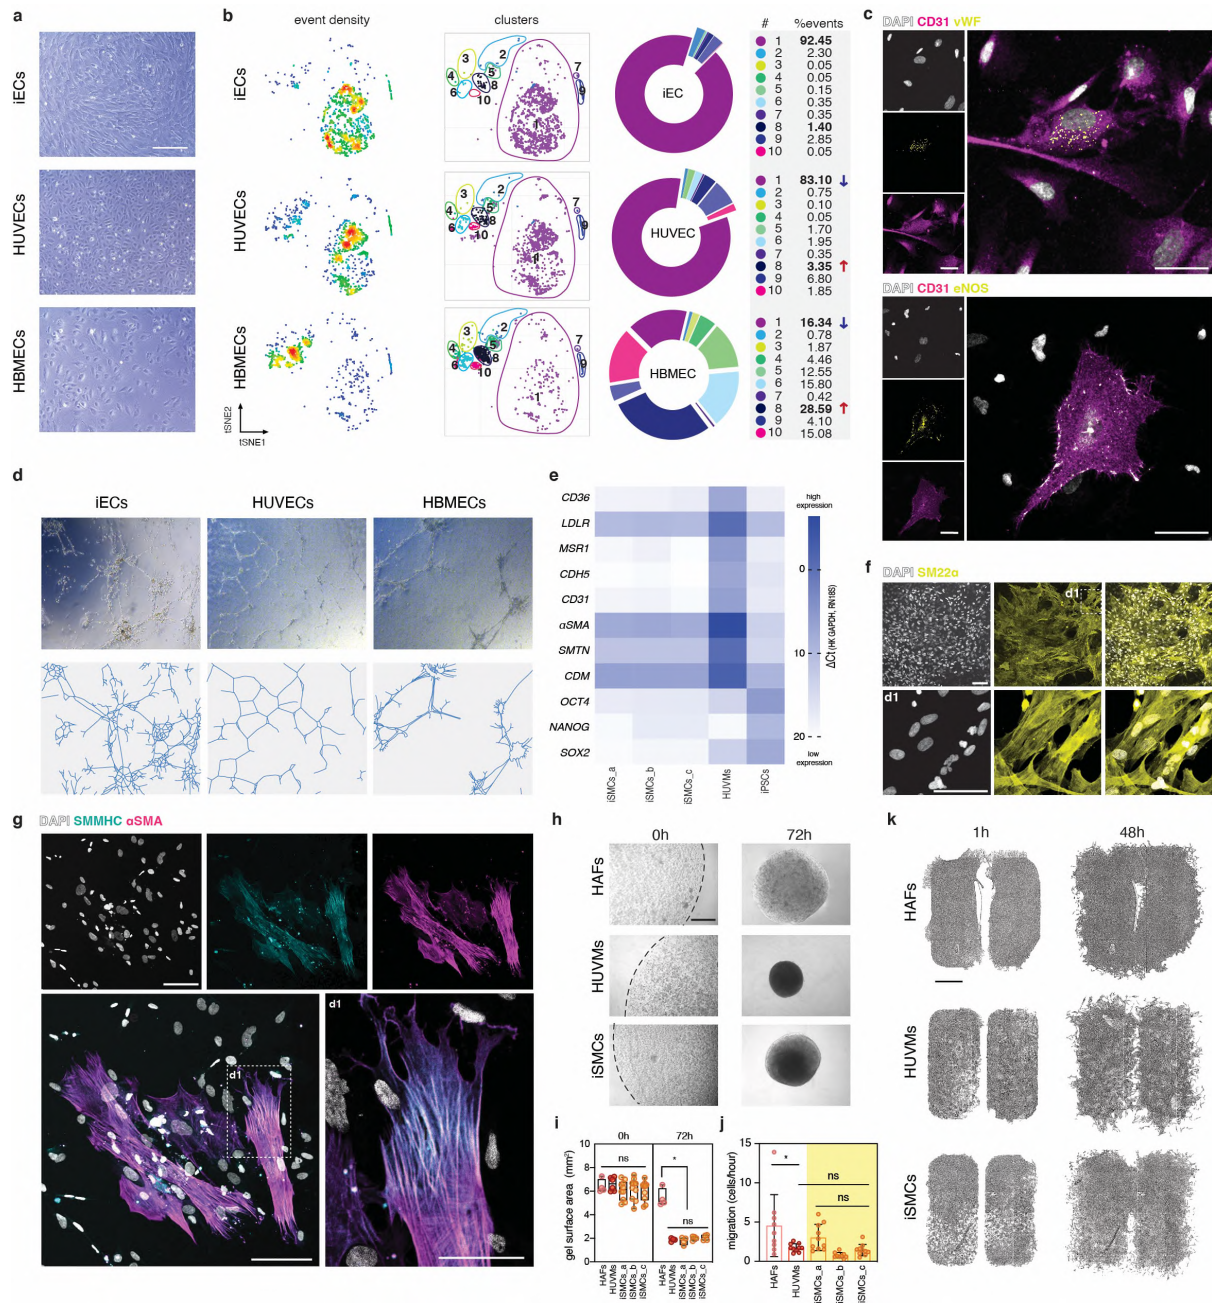

**Figure 1. Generation and characterization of syngeneic endothelial and smooth muscle cells from iPSCs for vascular tissue engineering.** (a) Bright field images of iECs, HUVECs and HBMECs. Scale bar 250  $\mu$ m. (b) Flow-cytometry characterization of different endothelial cells (iECs, HUVECs, and HBMECs) with a multicolor and poli-marker panel. Multidimensional data are shown in 2D tSNE plots. Event density, FlowSOM clusters and cluster abundances (% of events) are shown. Red arrows indicate cell clusters with increased abundance in HUVECs and HBMECs (vs iECs), and blue arrows indicate cell clusters with decreased abundance in HUVECs and HBMECs (vs iECs). (c) IF characterization of iECs. iECs express platelet endothelial cell adhesion molecule precursor (CD31), von Willebrand factor (vWF) and endothelial nitric oxide synthase (eNOS). Scale bars 50 $\mu$ m. (d) Characterization of iECs functionality via tube formation assay. (e) Characterization of iSMC differentiation through RT-qPCR. HUVMs and iPSCs are used as positive and negative controls, respectively. (f) iSMCs expression of the smooth muscle protein transgelin (SM22a). d1= detail. Scale bars 100 $\mu$ m. (g) iSMCs expression of smooth muscle myosin heavy chain (SMMHC) and smooth muscle alpha actin ( $\alpha$ SMA). d1= detail. Scale bars 100 $\mu$ m. (h-i) Characterization of iSMCs functionality using a fibrin gel contraction assay. Assay duration = 72h. Scale bar 250 $\mu$ m. (j-k) Characterization of iSMCs plasticity with wound healing assay. Assay duration = 48h, Scale bar 2mm. p values are reported in the text.

1 To generate native-like human vessels, we developed a versatile tissue-engineering approach based  
2 on a custom-made fluidic device. The device was connected to an automated, pulsatile flow system  
3 creating a dynamic and controlled culturing environment ([Figure 2a-e](#), [Supplementary Fig.3](#),  
4 [Supplementary Video1-2](#), [Supplementary File1-5](#)). To understand the inner flow distribution, we  
5 developed a CFD model of the fluid-domain considering perfusion through the inlet pipe at a constant  
6 flow rate, fluid density, and dynamic viscosity ([Supplementary Fig.4-5-6](#)). We obtained a stable steady-  
7 state solution with low Reynolds numbers, suggesting the presence of a laminar flow. The model  
8 predicted arterial-like flow velocity within the vessels, ranging between 0.03 m/s at the extremities and  
9 0.15 m/s in the lumen, and a total pressure ranging from 127 Pa at the inlets to about 20 Pa at the  
10 outlets ([Figure 2c-d](#), [Supplementary Fig.4-5](#)). Importantly, the results were comparable at each position  
11 for all the vessels, thus suggesting the suitability of the device for multiplexing and high-reproducibility  
12 approaches ([Figure 2c-d](#), [Supplementary Fig.3](#), [Supplementary File6-7](#)). We then combined iECs and  
13 iSMCs to assemble tissue-engineered vessels from human induced pluripotent stem cells (hiTEVs),  
14 cultured them within the fluidic device, and compared them to human explants. hiTEVs showed lumen  
15 endothelialization concomitant with collagen accumulation throughout the para-luminal area, and the  
16 formation of confined, multicellular media layers perpendicularly aligned to the flow direction ([Figure 2f-](#)  
17 [h](#)). Taken together, these observations suggest that our culturing setup and tissue-engineering strategy  
18 promote the assembly of vessels with a stratified, native-like microanatomy.



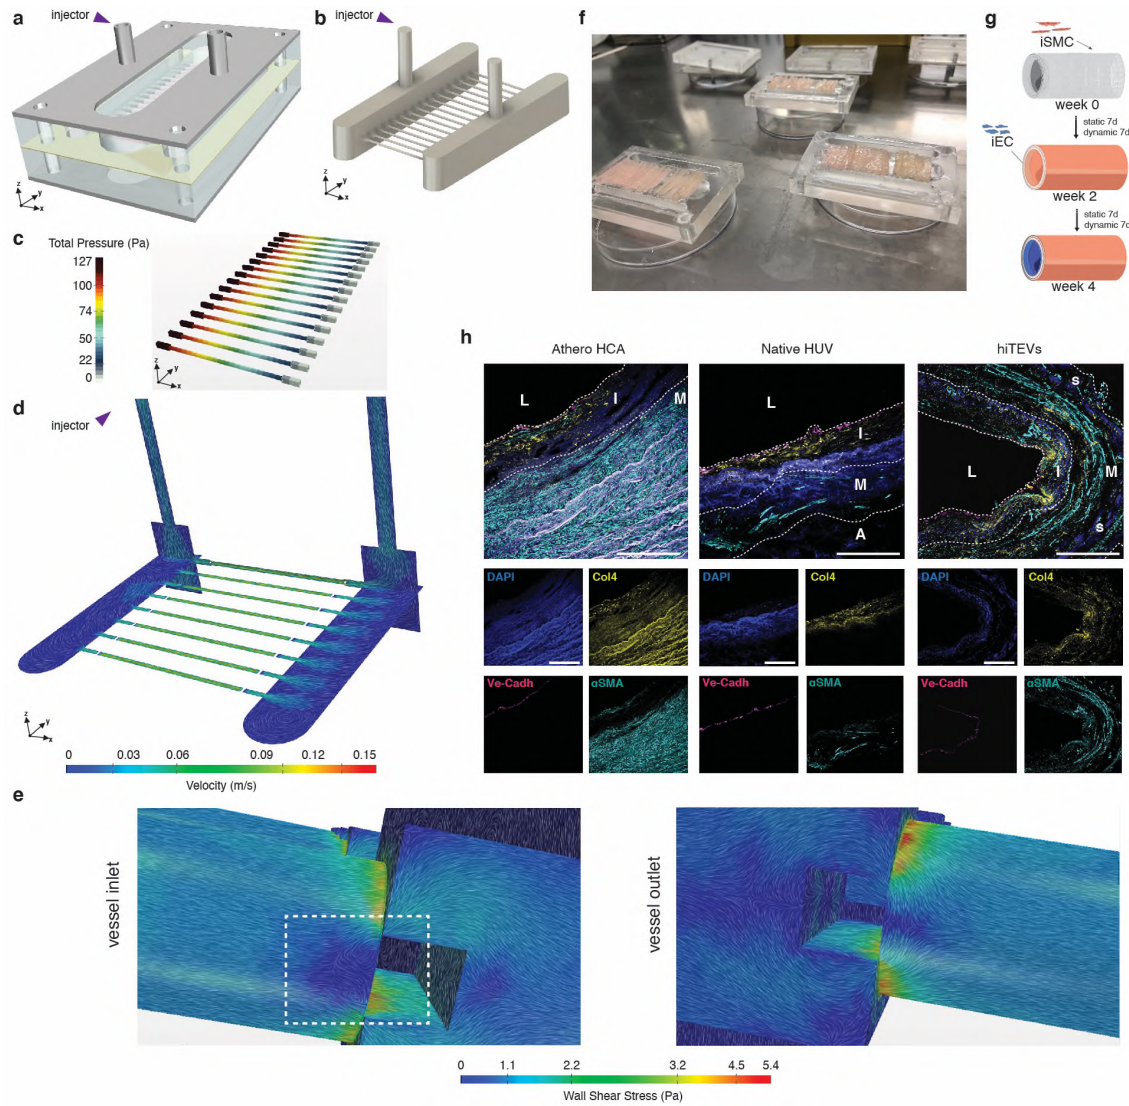

**Figure 2. Small-caliber human iPSC-derived tissue engineered vessels.** (a) CAD model of the assembled fluidic chamber. (b) Flow domain. Inner volume of the chamber occupied by the culturing medium. (c) Depiction of the pressure gradient within the tissue engineered vessels (hiTEVs). (d) Cross-sectional and longitudinal view of the flow velocity in the chamber and in the hiTEVs. (e) Wall shear stress at the hiTEV-inlets and hiTEV-outlets. The velocity field is superimposed to the flow domain and depicted using line-integral convolution. Whirlpools are highlighted in the rectangle. (f) Multiple, sterile fluidic chambers loaded with hiTEVs after intraluminal seeding of iECs. (g) Schematics of the tissue-engineering strategy adopted in the study. (h) IF comparison of carotid arteries from patients' samples (Athero HCA), Native human umbilical vessels (Native HUV), and tissue-engineered arteries from iPSCs (hiTEVs). L = lumen, I = intima layer, M = media layer, S = PGA/P4HB scaffold remains. Scale bars 100 μm.

1 **2. Computational fluid dynamic analysis predicts atheroprone, hyperplastic, LDL-laden**  
2 **inflammatory niches in tissue-engineered small-caliber vessels cultured *in vitro*.**

3 To develop an *in silico* model of atherosclerosis we adapted our CFD simulation by introducing LDL  
4 particles at the inlet boundary as a concentration field (passive scalar). We modeled advection, drag, lift  
5 forces and random motion of LDL particles diffusing in the fluid domain (Figure 2e, Figure b-g). We  
6 elaborated a dynamic surface growth prediction where we extrapolated the putative degree of LDL  
7 deposition in the intima (growth rate) (Figure 3c-d). Importantly, we identified possible athero-  
8 susceptible regions at each vessel inlet. The flow conditions in such regions were absent elsewhere  
9 and were characterized by low wall shear stress (WSS) ranging from 0.2 to 0.4 Pa, by the presence of  
10 whirlpools and steady vortices, and by a predilection for impacting and accumulating LDL (Figure 3d-  
11 f). To validate our *in silico* data, we developed an *in vitro* disease model using hiTEVs (Figure 3k). We  
12 regularly perfused hiTEVs with LDL at hyperlipidemic concentrations and with inflammatory cells.  
13 Inflammatory cells consisted of macrophage precursors (iMPs) originated from iPSCs (Figure 3j,  
14 Supplementary Fig.7). The iMPs upregulated monocyte-macrophage lineage-specific genes when  
15 compared to undifferentiated hiPSCs (CD36  $p = 0.03$ , MSR1  $p = 0.03$ ), similarly to THP-1  
16 monocytes/macrophages (Supplementary Fig.7). A flow-cytometry characterization revealed that iMPs  
17 comprise three sub-populations: pro-inflammatory monocytes/macrophages expressing  
18 CD14<sup>high</sup>/CD16<sup>high</sup>/CD11b<sup>high</sup> (Mo\_pro-inf\_1, 14.2% ± 6.8, and Mo\_pro-inf\_2, 42.2% ± 9.1), and  
19 macrophages being CD14<sup>low</sup>/CD16<sup>high</sup>/CD11b<sup>high</sup> (Mf 1, 40.8% ± 12.6) (Supplementary Fig.7). Upon  
20 differentiation, iMP-derived macrophages adhered to the culture flask, developed a large CD11b<sup>+</sup> cell  
21 body, and could uptake LDL in a dose-dependent manner (Figure 3h-j, Supplementary Video3). At the  
22 end of four weeks of modeling time, we observed the formation of localized bulges at the hiTEV-inlets,  
23 similar to atherosclerotic plaques (Figure 3l). The hiTEV-outlets were not affected by tissue hyperplasia  
24 and were hereafter chosen as internal negative controls of plaque deposition. We then investigated  
25 whether such plaque-like structures included CD11b<sup>+</sup> macrophages differentiating from the perfused  
26 iMPs. We found that iMPs in the pulsatile stream adhered to the vessel lumen, and migrated into the  
27 intima layer, gathering in CD11b<sup>+</sup> intra-vessel aggregates (Figure 3m-n, Supplementary Fig.7). Such  
28 cellular aggregates were not observed in hiTEV-outlets, in non-treated controls (without LDL, with iMP  
29 perfusion = LDL-/iMPs+), nor in native healthy vasculature. However, in atherosclerotic carotid artery

1 explants we identified similar structures ([Figure 3m](#), [Supplementary Fig.8](#)). In LDL-/iMPs+ controls we  
2 observed CD11b+ cells adhering to the lumen, invading the tissue, but not colocalizing within plaque-  
3 like areas nor accumulating in the inner vessels ([Supplementary Fig.8](#)). Taken together, our findings  
4 support the hypothesis that plaque deposition is a process driven by disturbed flow dynamics in  
5 combination with and a pro-inflammatory and hyperlipidemic state<sup>5</sup>. Importantly, our multifaceted  
6 approach enabled the *in vitro* modeling of plaque buildup within a replica of a human vessel in a  
7 reasonable time frame.



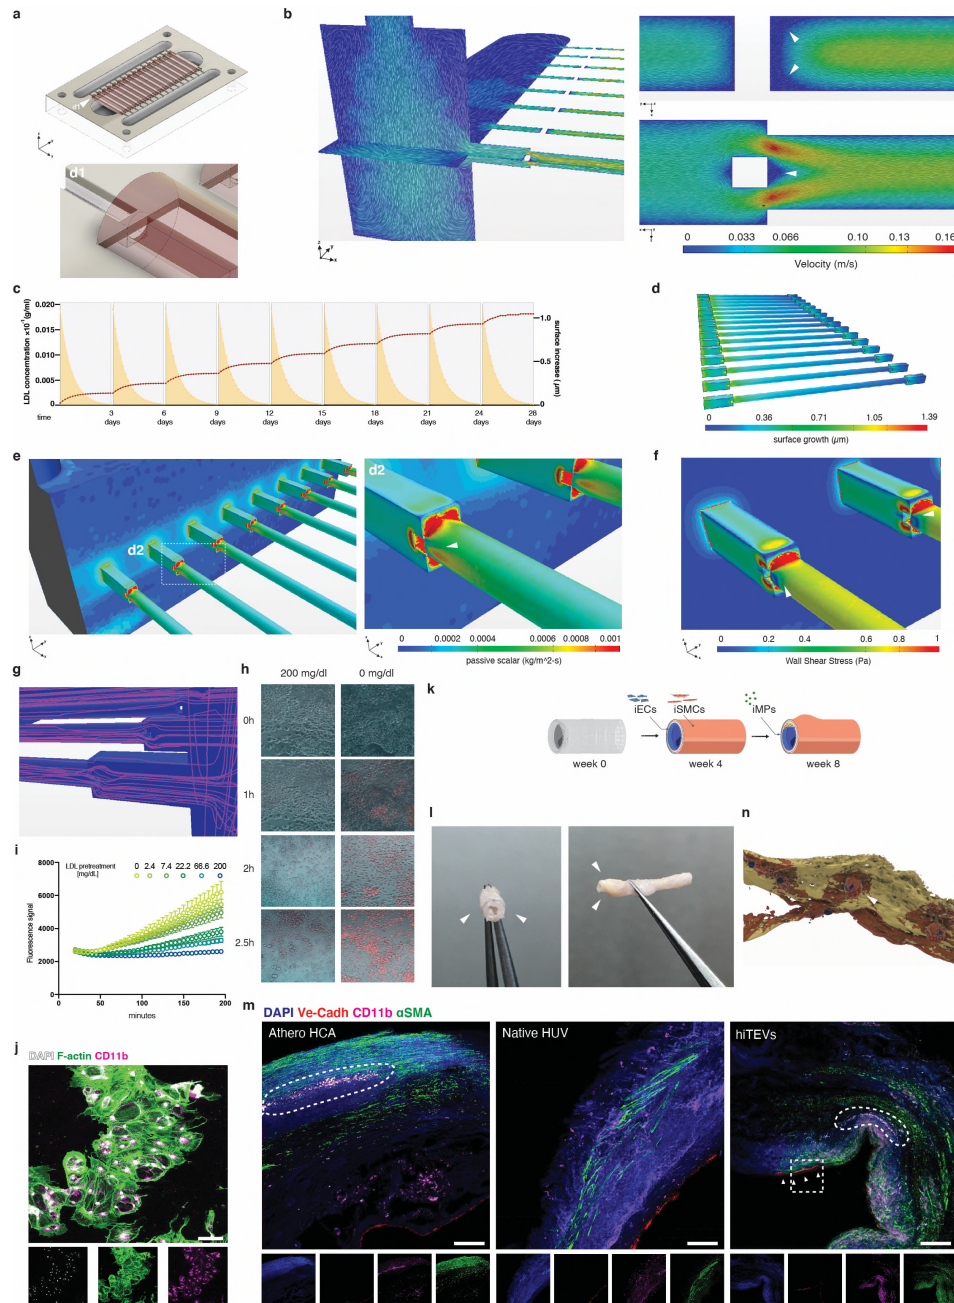

**Figure 3. *In silico* and *in vitro* modelling of atherosclerotic plaque deposition.** (a) CAD model of the fluidic device loaded with hiTEVs (in red). A detail of a vessel inlet (d1). (b) Flow velocity within the device and at the hiTEV-inlets from different perspectives. Vortices and whirlpools are indicated by the arrow. (c) CFD prediction of LDL accumulation in the hiTEVs over time (28 days). Concentration of LDL perfused through the device over time (yellow), spiking at every medium change. Prediction of LDL-dependent surface area increase during modeling (red dotted line). The first 1,500 bioreactor cycles upon medium change are reported. (d) Surface growth at the end of the modelling time. (e) Accumulation of LDL (passive scalar) at the inlets and a close-up detail (d2). (f) WSS at the inlets. (g) Modeled hypothetical tracks of the LDL particles within the device (purple lines). (h-i) iMP-macrophages uptake of PhHRodoRed over time. (j) IF characterization of iMP-macrophages. Scale bar 100 $\mu$ m (k) Tissue-engineering and modeling strategy. (l) hiTEVs after 28 days of modeling. Arrows indicate plaque-like regions. (m) IF comparison of atherosclerotic carotid arteries (Athero HCA), Native human umbilical veins (Native HUV), and tissue-engineered arteries from iPSCs (hiTEVs). L = lumen, I = intima layer, M = media layer, S = scaffold remains. Scale bars 200  $\mu$ m. Round boxes = CD11b+ cell aggregates. Arrows indicate regions where CD11b+ cells adhere to the inner wall of hiTEVs. (n) CAD reconstruction of the highlighted square region in Fig.3(m) performed from images acquired at the confocal microscope. iMPs adhering to hiTEV-lumen (CD11b+ cell body in dark red, nuclei in blue, Ve-Cadh in light brown).

1 **3. Automated clustering identifies atheroma signature cell populations in modeled and native**  
2 **plaques.**

3 To validate our model, we compared plaque-resident cell populations from hiTEV-inlets to cells from  
4 hiTEV-outlets, as well as cells from native explants deriving from human atherosclerotic and non-  
5 atherosclerotic vessels. We applied multiparameter flow-cytometry combined with dimensionality  
6 reduction and clustering tools (Figure 4a-c). First, we investigated the changes in cell-cluster  
7 abundances between native healthy and native diseased explants. We found that native atherosclerotic  
8 lesions had proportionally less monocytes/macrophages populations (cluster 2, cluster 3,  $p = 0.04$ ), and  
9 overall dendritic cells (cluster 5, cluster 6,  $p = 0.03$ ) when compared with their healthy counterpart.  
10 However, native lesion showed proportionally more dendritic cells characterized by low HLA-DR levels  
11 (CD11c+, CD31+, HLA-DR<sup>low</sup>), and high surface expression of LDL scavenger receptor (CD11c+,  
12 CD36+, HLA-DR<sup>low</sup>) (cluster 8, cluster 7,  $p = 0.05$ ). Next, we compared the cell population abundances  
13 between hiTEV-inlets and hiTEV-outlets. We found that hiTEV-inlets had proportionally fewer  
14 monocytes/macrophages (cluster 2,  $p = 0.04$ ), but significantly more dendritic cells with lower levels of  
15 HLA-DR, and high surface expression levels of LDL scavenger receptor (Cluster 7,  
16 CD11c+/CD36+/HLA-DR<sup>low</sup>) ( $p = 0.05$ ) than hiTEV-outlets (Figure 4a-c, Supplementary Fig.9). We then  
17 looked at the cell populations within healthy native explants and hiTEV-outlets, and we did not find any  
18 significant difference in the targeted cell populations between the two. Finally, we compared native  
19 plaques and hiTEV-inlets. Here, we found similarities in population abundances of dendritic cells with  
20 low HLA-DR levels and high levels of LDL scavenger receptor (cluster 7, ns,  $p = 0.27$ ),  
21 SMCs/myofibroblasts (cluster 9, ns,  $p = 0.68$ ) and monocytes/macrophages (cluster 1, ns,  $p = 0.10$ ).  
22 However, native plaques still had higher abundance of dendritic cells with low HLA-DR levels (cluster  
23 8,  $p = 0.04$ ) (Figure 4a-c, Supplementary Fig.9). These results offer an in-depth profile of the signature  
24 cell populations within hiTEV-inlets and native plaques, suggesting that our atherosclerosis-on-a-chip  
25 model may well approximate reality.



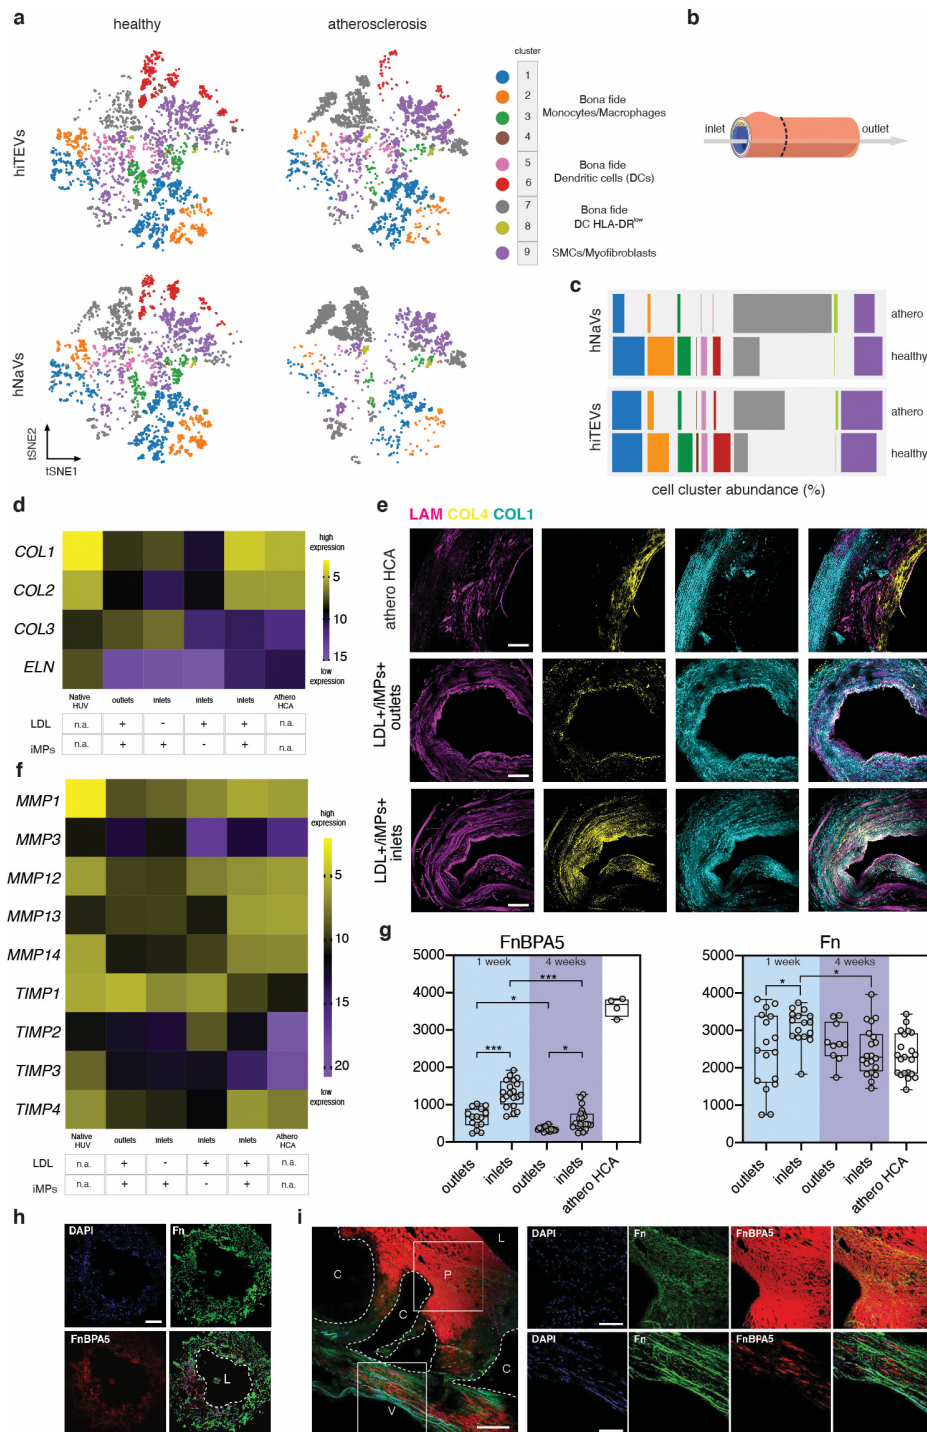

**Figure 4. Cellular and extracellular characterization of native and tissue-engineered plaques.** (a) tSNE plots with overlaid FlowSOM clustering displaying relative cell population abundances. Cell populations in healthy tissue-engineered hiPSC-derived small-caliber vessels (hiTEV-outlets) and human native healthy vasculature (healthy hNaVs) are compared with their diseased counterpart: hiTEV-inlets and atherosclerosis hNaVs, respectively. (b) Overview of the analysed hiTEV-regions. (c) Display of relative population abundances in an exploded stacked bar chart. (d) RT-qPCR of Collagens and elastin in hiTEVs and native tissues (Native HUV, Athero HCA). (e) IF analysis of ECM components. LDL+/iMPs+ treated hiTEV-inlets are compared to their internal negative control LDL+/iMPs+ treated hiTEV-outlets. Scale bars 200  $\mu$ m. (f) RT-qPCR of genes involved in ECM remodeling: matrix metalloproteinases (MMPs) and tissue inhibitors of matrix metalloproteinases (TIMPs). (g) FnBPA5 peptide binding (red) in hiTEV-inlets vs hiTEV-outlets. Counterstaining of fibrillar fibronectin (green) in the same specimens. (h) Distribution of FnBPA5 (red) and fibrillar fibronectin (green) within the ECM of a representative dissected hiTEV-inlet and (i) native carotid plaque. P = atherosclerotic plaque, C = former calcified regions, V= vessel tunica media, L = lumen. Scale bars 200  $\mu$ m.

1 **4. Transcriptional profile of ECM homeostasis, and FnBPA5 peptide-binding patterns provide a**  
2 **signature of increased extracellular matrix remodeling in engineered plaques.**

3 To explore the extracellular matrix remodeling landscape of atherosclerotic plaques, we investigated  
4 the transcriptional profile of classical ECM-related genes throughout hiTEVs and human samples. We  
5 found substantial transcriptional differences in collagen and elastin genes between LDL+/iMP+ hiTEV-  
6 inlets and hiTEV-inlets outlets. In detail, hiTEV-inlets had fewer transcripts for *COL1*, *COL2* and *ELN*  
7 ( $p = 0.04$ ,  $p = 0.03$ ,  $p < 0.001$  respectively) compared to hiTEV-outlets, hinting to a possible suppressive  
8 effect on such ECM-related genes by a combination of iMPs, LDL and the peculiar flow dynamics at  
9 the hiTEV-inlets (Figure 4d, Supplementary Table1). Importantly, the microanatomical localization of  
10 the ECM components and relative expression of genes for ECM anabolism from hiTEV-inlets and native  
11 plaques were similar (*COL1* ns  $p = 0.39$ , *COL2* ns  $p = 0.42$ , *COL3* ns  $p = 0.38$ , *ELN* ns  $p = 0.27$ ) (Figure  
12 4e). Next, we compared the gene expression profile of markers for ECM remodeling, including matrix  
13 metalloproteinases (MMPs) and their tissue inhibitors (TIMPs) (Figure 4f, Supplementary Table2,  
14 Supplementary Table3). We found that hiTEV-inlets had low *TIMP1* ( $p = 0.03$ ) and high MMP13 ( $p =$   
15  $0.04$ ) relative transcript abundance compared to hiTEV-outlets, and that LDL alone exerted a  
16 downregulation effect on *MMP3* ( $p = 0.03$ ), while upregulating *TIMP2* ( $p = 0.05$ ). When we compared  
17 native plaques to hiTEV-inlets, we reported a significant downregulation of *TIMP2* and *TIMP3* ( $p < 0.001$   
18 in both cases). However, no other differences were uncovered, indicating that our model may well  
19 recapitulate the ECM transcriptional profile of human atherosclerotic lesions. Last, we focused on  
20 fibronectin (Fn) fibers, one of the first assembled and remodeled ECM fibers during inflammation<sup>26,27</sup>  
21 (Figure 4g-i). Based on previous evidence<sup>20,26</sup>, we hypothesized that the peculiar and dynamic flow  
22 environment can affect Fn remodeling in both native plaques and in hiTEVs. To test our hypothesis, we  
23 stained human native plaques using a fluorescently labeled FnBPA5 peptide, capable of binding to  
24 fibronectin fibers with a relaxed conformational state following exposure to low strain. Such low-strain  
25 regions are particularly common in fibrotic and overly remodeled tissues<sup>27</sup>. We found that the FnBPA5  
26 peptide selectively binds to plaque regions, indicating a prevalence of Fn fibers under low strain (Figure  
27 4i). Furthermore, we stained hiTEVs and we found that the FnBPA5 peptide could selectively bind to  
28 ECM regions at the hiTEV-inlets already after one week ( $p < 0.001$ ) and until the modeling endpoint ( $p$   
29  $= 0.01$ ) (Figure 4g-h). Overall, our data indicate that the athero-prone modeling environment promotes

- 1 a profound reshuffling of ECM components within the tissues. The observations that human late-lesions
- 2 and hiTEV-inlets were positive for FnBPA5 staining, support our hypothesis stating that fluid dynamic-
- 3 dependent mechanical strains are promoters of Fn and, on a broader perspective, of ECM remodeling.

## 1 Discussion

2 Despite decades of atherosclerosis research, the detailed pathophysiology of plaque seeding,  
3 progression and rupture have yet to be elucidated<sup>2</sup>. To dissect each step of the process and to ultimately  
4 restrain disease progression, it is pivotal to develop human cell-based disease models with high  
5 translational relevance. This work introduces a human plaque-on-a-chip *in vitro* model entirely  
6 developed with tissue-engineered vessels from syngeneic iPSC-derived cells. To serve our modeling  
7 purpose, we established a novel vascular tissue engineering (VTE) approach which included tailored  
8 iPSCs differentiation strategies and the alternation between static and dynamic culturing conditions in  
9 a customized fluidic device. Other VTE approaches have attempted to recapitulate the human anatomy  
10 using hiPSC-derived or native cells<sup>19,28-30</sup>. However, these works lack sufficient molecular and functional  
11 characterization of the employed cellular compartment, detailed histological analyses, and the  
12 description of a reproducible culturing setup. Here, we presented a detailed collection of protocols, data  
13 and materials to overcome these issues. Next, we developed a CFD analysis that highlighted regions  
14 at the hiTEV-inlets characterized by flow disturbances and whirlpools, which were more prone to long-  
15 lasting impact and therefore accumulation of LDL particles. Therefore, our CFD model predicted  
16 possible atheroprone, hyperplastic, LDL-laden inflammatory regions. These findings are in line with  
17 previous reports<sup>10,13,15</sup> and complement our *in vitro* modeling results from the perfusion of hiTEVs in  
18 atheroprone conditions<sup>10,31,32</sup>. Our findings support the hypothesis that atherosclerotic plaque  
19 deposition is a process orchestrated by the phagocytic ability of macrophages and dendritic cells,  
20 gathering in the sub-intima, and by shear-dependent blood-wall mass transport, providing a first *in vitro*  
21 evidence of such combined processes<sup>1,33-37</sup>. We also identified atheroma signature cell populations  
22 through immune cell profiling of the human plaque in both native and tissue-engineered specimens,  
23 adding a new layer of information to previous discoveries<sup>21,38</sup>. We then dissected and compared the  
24 extracellular matrix milieu of native and tissue-engineered plaques finding a close resemblance in  
25 transcriptional levels of genes for ECM assembly and remodeling. Importantly, specimens from hiTEV-  
26 inlets showed a downregulation of elastin transcripts to levels similar to those found in native plaques  
27 and differently from what was observed in healthy native samples. Similar findings have been reported  
28 by previous *in vivo* studies<sup>39,40</sup>. Last, we found similarities between native and bioengineered plaques  
29 concerning FnBPA5 peptide-binding patterns. FnBPA5 was previously used to assess the tensional

1 state of fibronectin fibers in tumors<sup>27</sup>. Here, we report for the first time the ability of the FnBPA5 peptide  
2 to bind both to native and bioengineered plaque regions, providing a possible diagnostic tool and a hint  
3 for the development of novel, less invasive, therapies that may locally counteract plaque progression.  
4  
5 Besides the advancements, it is important to mention the limitations of our approach. First, the flow-  
6 cytometry characterization and the qPCR analysis performed on hiPSCs-derived iECs, iSMCs, and  
7 iMPs revealed that these cells retain a fetal-like phenotype, a common characteristic of most hiPSC-  
8 derived cells, which has been extensively described<sup>29</sup>. However, it is important to mention that, contrary  
9 to common belief, atherosclerosis is a vascular condition independent of age, affecting both young and  
10 elderly subjects. Atherosclerotic plaques have been found in the vascular system of fetuses<sup>41</sup>,  
11 children<sup>42</sup>, and young adults<sup>43</sup>. Conversely, severe consequences of atherosclerosis due to plaque  
12 rupture or plaque erosion, maintain a higher prevalence in elderly subjects, and this is mainly due to  
13 the presence of other comorbidities exacerbating the disease progress<sup>44</sup>. With this in mind, we believe  
14 that the impact of the phenotypical cell age on the model output is only limited. As a second limitation,  
15 our model investigates intravascular inflammatory events mediated by macrophage precursors and  
16 does not include other cells that might interfere with the etiology of the disease (i.e., T and B cells)<sup>45</sup>.  
17 The choice to omit those cell types from the modeling setup was driven by the aim to explore a  
18 minimalistic disease scenario to test the response-to-retention hypothesis of early atherogenesis<sup>3</sup>,  
19 which we later confirmed. Third, our CFD model lacks accurate rendering of the vascular component,  
20 herein considered as an inert element. The model could be improved in the future by including more  
21 informative boundary conditions based on data from mechanical testing experiments. Moreover, our  
22 computational model could be further enhanced by implementing accurate finite element modeling  
23 (FEM) and fluid-to-solid interaction (FSI) studies. Such modeling updates shall be based on two-way  
24 coupling computations, where LDL particles are influenced by the system (i.e., medium flow) and by  
25 possible impacts with other particles within the device. In conclusion, the implementation of CFD  
26 approaches in tissue engineering and personalized medicine is now on the rise<sup>46</sup>. Interdisciplinary  
27 approaches based on CFD coupled with tissue-engineering will contribute to the development of more  
28 accurate TE models, offering a new toolbox to gather insights into the physiologic and pathophysiologic  
29 remodeling phenomena observed in atherosclerosis development but not limited to this field.

## 1 **Materials and methods**

### 2 **1. Cell culture**

3 *1.1 Culture of human induced pluripotent stem cells.* Two different induced pluripotent stem cell lines  
4 derived from skin fibroblasts were used to conduct the tissue engineering experiments included in this  
5 work, HPSI0114i-eipl\_1 (RRID:CVCL\_AE06) and WTB6 (RRID:CVCL\_VM30), were purchased from  
6 the European Bank for induced pluripotent stem cells (EBiSC). hiPSCs were thawed into 6 well plates  
7 (TPP) that were pre-coated for 1h at RT with 10 µg/ml Vitronectin (Stem Cell Technologies) in  
8 CellAdhere dilution buffer (Stem Cell Technologies). Each coated plate was prepared fresh before use.  
9 iPSCs were thawed in 1 ml of mTeSR medium (Stem Cell Technologies) with the addition of 10 µM  
10 Rho kinase inhibitor (ROCKi, Y-27632; Sigma). After 24h, and upon adhesion of the cells to the bottom  
11 of the well, the medium was replenished with mTeSR without ROCKi. The medium was refreshed every  
12 day after 1 washing step in DPBS (Gibco). The cells were constantly monitored for signs of  
13 differentiation such as the formation not-well defined colony edges, or variations in colony shape from  
14 the regular circular-oval morphology. The hiPSCs were passaged at about 70% confluence. Here, cells  
15 were detached with ReLeSR (Stem Cell Technologies) at 37°C for about 5 min. Next, mTeSR medium  
16 was added in a 1:1 ratio, and the detached cell aggregates were carefully transferred to a 50 ml (Falcon)  
17 tube using 5 ml pipettes to avoid the formation of single-cell suspensions. Generally, hiPSCs cultures  
18 were passaged every 4-7 days using either a 1:4 or a 1:6 split ratio.

19  
20 *1.2 Culture of endothelial cells.* Human umbilical vein endothelial cells (HUVECs) were harvested from  
21 healthy specimens of umbilical cords donated to the Institute for Regenerative Medicine of the  
22 University of Zurich, within the work frame approved by the Kantonale Ethikkommission Zürich (KEK-  
23 Stv-21-2006). Umbilical cords were dissected, and the umbilical vein was isolated, washed in PBS  
24 (Gibco), and infused with an enzymatic mix of collagenase/dispase following the manufacturer's  
25 instructions (Sigma) for 20 min. At this point, the enzymatic solution was collected in a 50 ml tube  
26 (Falcon). Umbilical veins were then washed in PBS and each wash was collected in the same tube with  
27 the rinsed enzymatic solution. EGM-2 medium (Lonza) was added in a 1:1 ratio to the cell suspension  
28 before a centrifugation step at 300g for 5 min. HUVECs were pelletized, resuspended in EGM-2



1 medium, and plated onto 0.1% gelatin-coated (Sigma) 6 well plates. The medium was refreshed every  
2 2-3 days, following 2 washes in PBS. HUVECs were sub-cultured at about 80% confluence in a 1:6  
3 sub-culturing ratio. Human brain microvascular endothelial cells (HBMECs) were purchased from  
4 ScienCell Research Laboratories cultured, sub-cultured and processed as described for the HUVECs.

5  
6 *1.3 Fibroblasts and myofibroblasts.* Human umbilical vein myofibroblasts (HUVMs) were harvested from  
7 healthy umbilical cords donated to the Institute for Regenerative Medicine of the University of Zurich,  
8 within the work frame approved by the Kantonale Ethikkommission Zürich (KEK-Stv-21-2006). Umbilical  
9 cords were dissected, and the umbilical vein was isolated, washed in PBS and cut into pieces of 1mm  
10 × 1mm size. Vein wall fragments were then scattered onto 10cm Petri dishes (TPP) and let adhere to  
11 the bottom of the plate for 15 min before the addition of DMEM medium, that was prepared as follows:  
12 10% FBS (Gibco), 1% Glutamax (Gibco) and 1% Penn Strep (Sigma) in DMEM medium (Sigma). After  
13 about 10 days, myofibroblasts were sprouting from the tissue fragments forming a layer of about 60%  
14 confluence. Here, cells were detached from the dish using Trypsin – EDTA solution 0.025% (Sigma),  
15 washed in PBS and sub-cultured at a 1:3 ratio. The DMEM medium was refreshed every 2-3 days, after  
16 a wash in PBS. HUVMs were passaged at 80% confluence. Human aortic fibroblasts (HAFs) were  
17 purchased from ScienCell Research Laboratories and processed as described for HUVMs.

## 18 **2. hiPSCs differentiation**

19 *2.1 Differentiation of hiPSCs to arterial endothelial cells.* The hiPSCs were differentiated to arterial ECs  
20 via mesodermal lineage control performed using VEGF and cyclic AMP, following an adapted version  
21 of the protocol published by T.Ikuno *et al.*<sup>47</sup>. In detail, hiPSCs colonies were disaggregated to single  
22 cells and plated onto freshly prepared thin-coated Matrigel plates (Corning, 1:60) at a density ranging  
23 between 60.000-80.000 cells/cm<sup>2</sup> (Day 0). Cells were cultured for 72h in mTeSR medium enriched with  
24 4ng/ml FGF-B. (Gibco). At this point, the differentiating cells were further coated with a thin layer of  
25 Matrigel (1:60) and after 24h, the medium was replaced with RPMI1640 medium (Sigma) enriched with  
26 2mM Glutamax, 1×B27 supplement minus insulin (Gibco), and 125 ng/ml activin-A (PeproTech). After  
27 18h, the medium was replaced with RPMI1640 medium enriched with 2mM Glutamax, 1×B27  
28 supplement minus insulin, 10ng/ml BMP-4 (Sigma), 10 ng/ml FGF-B and Matrigel (1:60). On Day 8, the

1 medium replacement was performed with RPMI1640 enriched with 2mM Glutamax, 1xB27 supplement  
2 minus insulin, 1mM 8bromo-cAMP (Stem Cell Technologies) and 100ng/ml VEGF-A (ThermoFisher).  
3 On Day 11, the differentiated CD144+ endothelial cells were magnetically sorted on MACS separation  
4 columns (Miltenyi Biotec) and seeded at a density of 10.000 cells/cm<sup>2</sup> on thin-coated, Matrigel dishes  
5 in RPMI1640 medium enriched with 2mM Glutamax, 1xB27 supplement minus insulin, 1mM 8bromo-  
6 cAMP, 100ng/ml VEGF-A and 10 μM ROCKi. On day 14, the medium was replaced with arterial  
7 specification medium prepared as follows: EGM-2 medium with 1mM 8bromo-cAMP. The arterial  
8 specification medium was refreshed on day 16 and the resulting arterial endothelial cells were  
9 harvested at day 19. iECs were cultured in EGM-2 medium, transferred onto 0.1% gelatin-coated dishes  
10 at a seeding density of 10.000 cells/cm<sup>2</sup>, and passaged when their confluence reached about 80%.

11

12 *2.2 Differentiation of hiPSCs to contractile smooth muscle cells.* hiPSCs were differentiated towards  
13 contractile smooth muscle cells using an adapted version of the protocol proposed by Yang *et al.*<sup>48</sup>. In  
14 detail, hiPSCs were pushed towards the mesodermal lineage by replacing the regular hiPSCs culturing  
15 medium mTeSR with mesodermal medium prepared as follows: 5μM CHIR99021(Stem Cell  
16 Technologies), 10ng/ml BMP-4, and 2% B27 with insulin (Gibco) in RPMI1640 medium (Day 0). On day  
17 3, the medium was replaced with RPMI1640 enriched with 25 ng/ml VEGF-A, 25 ng/ml FGF-B and 2%  
18 B27 minus insulin. The medium was refreshed on day 5. On day 7, the medium was replaced with  
19 RPMI1640 enriched with 5ng/mL PDGF-B (Stem Cell Technologies), 2.5 ng/mL TGF-B (PeproTech),  
20 and 2% B27 with insulin. A medium refreshment was performed every other day for the following six  
21 days. On day 14, the contractile SMCs were selected by culturing the cells in RPMI1640 with 4mM  
22 lactate (Sigma). On day 20 the cells were harvested for further characterization or sub-cultured in SMC  
23 medium prepared as follows: 5% FBS, 2mM Glutamax, 5ng/mL PDGF-B, 2.5 ng/mL TGF-B in DMEM  
24 F12. The iSMCs were passaged at 80% confluence and seeded at a seeding density of 10.000  
25 cells/cm<sup>2</sup>.

26

27 *2.3 Differentiation of hiPSCs to macrophage precursors.* hiPSCs were differentiated to macrophage  
28 precursors (iMPs) following the protocol adapted from van Wilgenburg *et al.*<sup>31</sup>. In detail, 4 million hiPSC  
29 were seeded into an AggreWell 800 well (Stem Cell Technologies) to generate embryoid bodies (EBs)



1 using E8 medium (Stem Cell Technologies) and fed daily with medium supplemented with 50 ng/mL  
2 BMP-4, 50 ng/mL VEGF, and 20 ng/mL SCF (PeproTech). After 4 days, EBs were collected and used  
3 to setup macrophage factories in T75 flasks (75 EBs/flask) or T175 flasks (150 EBs/flask) in X-Vivo15  
4 (Lonza), supplemented with 100 ng/mL M-CSF (PeproTech), 25 ng/mL IL-3 (PeproTech), 2 mM  
5 Glutamax, 1% penn/strep solution, and 0.050 mM  $\beta$ -mercaptoethanol (Gibco). Fresh medium was  
6 added once per week. The iMPs were released into the supernatant after approximately 3 weeks of  
7 differentiation and were collected weekly. Upon collection, iMPs were passed through a 40  $\mu$ m cell  
8 strainer (Corning) to obtain a single cell suspension and were either plated at a standard density of  
9 100.000 cells/cm<sup>2</sup> and differentiated for 7 days to macrophages in X-Vivo15 supplemented with 100  
10 ng/mL M-CSF, 2 mM Glutamax, 1% penn/strep solution for mono-culture assays (i.e., LDL uptake  
11 assay), or resuspended in perfusion medium and added to the organ on-a-chip model.

12

### 13 **3. hiPSCs functional characterization**

14 *3.1 Tube formation assay - characterization of iECs.* Tube formation assay was performed following an  
15 adapted version of a previously described protocol<sup>47</sup>. Specifically, 10.000 differentiated ECs at day 19  
16 were plated on  $\mu$ -Slide Angiogenesis (Ibidi) in 10  $\mu$ l of Matrigel/well in EGM-2 medium and imaged at  
17 time-point 0h, and after 24h. HUVECs and HBMECs were used as controls cell lines. The experiments  
18 were conducted on eight cell lines which included iECs\_ AE061, iECs\_ AE062, iECs\_ AE063, from  
19 three separate differentiation experiments of the RRID:CVCL\_AE06 hiPSCs cell line; iECs\_ VM301,  
20 iECs\_ VM302, iECs\_ VM303, from three different differentiation experiments of the RRID:CVCL\_VM30  
21 hiPSCs cell line; HUVECs and HBMECs as control endothelial cell lines. Two technical replicates were  
22 performed for each cell in each separate experiment.

23

24 *3.2 Gel contraction test - characterization of iSMCs.* SMCs derived from hiPSCs were suspended  
25 ( $2.5 \times 10^5$  cells) in 60 $\mu$ l of an 8 mg/ml fibrinogen solution (Sigma). Hence, the fibrinogen cell suspension  
26 was mixed with 60  $\mu$ l of a 5 U/mL thrombin solution (Sigma) and carefully but quickly deposited in the  
27 center of a well of a 24 well plate (TTP) and incubated at 37°C for 10 min in order to allow the complete  
28 hydrogel polymerization. The gels were cultured in 1 ml DMEM medium containing 5% FBS, 300 U/ml

1 aprotinin (Sigma) to prevent hydrogel size reduction due to fibrinolysis, and 10  $\mu$ M ROCKi. Gel sizes  
2 were measured at day 0 and at day 3. HUVMs and HAFs served as controls cell lines. A total of eight  
3 cell lines were used for this experiment which included iSMCs\_ AE061, iSMCs\_ AE062, iSMCs\_  
4 AE063, from three separate differentiation experiments of the RRID:CVCL\_AE06 hiPSCs cell line;  
5 iSMCs\_ VM301, iSMCs\_ VM302, iSMCs\_ VM303, from three different differentiation experiments of  
6 the RRID:CVCL\_VM30 hiPSCs cell line; HUVMs and HAFs as control cell lines. At least 2 technical  
7 replicates were performed for each cell line, at each of the two time-points measured, and in each  
8 experiment. Data from different cell lines and time-points were analysed together via Two-way ANOVA,  
9 mixed-effects model with the Geisser-Greenhouse correction, and Tukey's multiple comparison test,  
10 with individual variances computed for each comparison.

11

12 *3.3 Wound healing assay - characterization of iSMCs.* SMCs derived from hiPSCs ( $4 \times 10^4$  cells) were  
13 resuspended in 140  $\mu$ l of DMEM medium containing 5% FBS and 2 mM Glutamax. The cell suspension  
14 was distributed in two silicon cell culture reservoirs of a 24-well plate culture-insert (Ibidi) positioned in  
15 the wells of 24 well plates. After 2h, upon full cell adherence to the bottom of the plate, the medium was  
16 refreshed. After 24 hours, the medium was further replaced with DMEM medium containing 1% FBS  
17 and 2 mM Glutamax, and the silicon inserts were removed to allow cell migration. Plates were imaged  
18 with a microplate reader (Tecan, SPARK multimode) and cell migration was reported at 0h and 48h  
19 post serum starvation. HUVMs and HAFs served as control cell lines. Sample size and statistics are  
20 the same as in "*3.2 Gel contraction test - characterization of iSMCs*".

21

22 *3.4 LDL uptake – iMPs characterization.* Macrophage precursors derived from hiPSCs SFC840-03-03,  
23 SFC854-03-02, SFC856-03-04 (previously characterized<sup>32</sup>), HPSI0114i-eipl\_1 and WTB6, were  
24 seeded at a density of 100.000 cells/cm<sup>2</sup> in flat, clear-bottom, black 96-well plates (Corning), and  
25 differentiated for 7 days in XVivo-15 medium enriched with 100 ng/ml M-CSF, 2mM Glutamax and 1%  
26 penn/strep solution. Labelled low-density lipoprotein, pHRodoRed-LDL (Invitrogen) was applied at a  
27 concentration of 2.5  $\mu$ g/ml in Life Imaging buffer (Gibco). Fluorescent images were acquired with the  
28 EVOS M7000 imaging system, supplied with an on-stage incubator unit kept at 37°C. Cells were imaged  
29 over 3 hours after pHRodoRed-LDL treatment. Fluorescence intensity was also monitored with

1 fluorescence plate reader (Tecan, Infinite M1000pro), heated to 37°C. Four reads per well were  
2 acquired, every 5 min, for a total 3 hours and the mean value was used for further analysis. The  
3 fluorescence plate reader was set with an excitation wavelength of 560 nm, 10 nm bandwidth, and with  
4 an emission wavelength of 585 nm, 15 nm bandwidth. For LDL uptake inhibition, cells were pre-treated  
5 with different concentrations of unlabelled LDL for 30 min (LeeBio) until temporary receptor saturation  
6 upon pretreatment with 200 mg/dl LDL. Then the medium was removed and directly replaced with Life  
7 Imaging buffer containing pHRedoRed-LDL. At least 2 technical replicates were measured for each cell  
8 line, for each unlabeled-LDL pretreatment and untreated controls in each experiment.

#### 9 **4. Native tissue specimens**

10 Biopsies of human umbilical veins were obtained from umbilical cords donated for research purposes  
11 from healthy subjects in accordance with the ethical protocol approved by the Kantonale  
12 Ethikkommission Zürich (KEK-Stv-21-2006). Participants have been informed about the research  
13 project before the tissue retrieval and the consent has been sought from each participant. No  
14 compensation was provided to the donor subjects. The sample retrieval was performed during a  
15 common clinical procedure therefore, no additional risks for the patient were present. Biopsies of carotid  
16 branches were obtained from patients undergoing scheduled carotid endarterectomy and shunting,  
17 secondary to vascular stenosis in accordance with the protocol approved by the Ethik Kommission der  
18 Universität Witten/Herdecke (Nr.79/2012). Inclusion criteria: age  $\geq$  18 years old, being scheduled to  
19 undergo a carotid endarterectomy. Exclusion criteria: malignancy, liver failure, renal failure (Creatinine  
20  $>180$  ug/ml), hereditary coagulation disorders, anaemia (Hb  $< 10$  g/dl), Rheumatic heart disease,  
21 Rheumatoid arthritis.

#### 22 **5. RT-qPCR**

23 *5.1 RNA extraction.* For RNA extraction the RNeasy Mini Kit (Qiagen) was used. In case of extraction  
24 from adherent cell cultures, the lysis buffer RTL with 10  $\mu$ l/ml  $\beta$ -mercaptoethanol (Sigma) was directly  
25 applied to the culturing plate, the solution was collected in low-bind PCR tubes (Eppendorf) and stored  
26 at -80°C until further processing. In case of RNA extraction from native tissues or hiTEVs, the tissues  
27 were disrupted in a tissue lyser (TissueLyser II, Qiagen) with 3 mm tungsten beads (Qiagen) in an RTL

1 solution with 10  $\mu$ l/ml  $\beta$ -mercaptoethanol and the tubes were stored at  $-80^{\circ}\text{C}$ . The isolated RNA was  
2 measured with a spectrophotometer (NanoDrop 2000, Thermo Scientific) and immediately processed  
3 for reverse transcription.

4

5 *5.2 Reverse transcription.* The reaction was performed for each sample in a final volume of 20  $\mu$ l  
6 reaction mix containing 1  $\mu$ g of RNA, 1  $\times$  PCR buffer, 5mM  $\text{MgCl}_2$ , 10 mM dNTPs, 0.625  $\mu$ M oligo d(T)<sub>16</sub>,  
7 1,875  $\mu$ M random hexamers, 20 U RNase inhibitors and 50 U MuLV reverse transcriptase  
8 (ThermoFisher). The thermocycler settings were as follows: 25  $^{\circ}\text{C}$  for 10 minutes, 42  $^{\circ}\text{C}$  for 1h, followed  
9 by 99  $^{\circ}\text{C}$  for 5 minutes. The resulting cDNA was either processed immediately, stored at 4  $^{\circ}\text{C}$  for a  
10 maximum of 48h, or transferred at  $-20^{\circ}\text{C}$  for long term storage.

11 *5.3 Quantitative real-time PCR (qPCR).* The reaction was performed for each sample in a final volume  
12 of 10  $\mu$ l reaction mix containing 30 ng of cDNA, a 1:1 mix of forward and reverse primers in a final  
13 concentration of 100nM and FAST SYBR green (ThermoFisher). The primers for each tested gene are  
14 summarized in the [Supplementary Table4](#). The qPCR was performed on StudioQuant7 (Applied  
15 Biosystems) and the amplification program was set as follows: 95 $^{\circ}\text{C}$  for 5 min, 40 cycles with 95  $^{\circ}\text{C}$  for  
16 10 seconds, 60  $^{\circ}\text{C}$  for 15 seconds, 72  $^{\circ}\text{C}$  for 20 seconds. The software QuantStudio 6 and 7 Flex Real-  
17 Time PCR System (Version 1.0) was used for data acquisition. Gene expression levels were normalized  
18 over the two housekeeping genes (HKG): the glyceraldehyde 3-phosphate dehydrogenase (*GAPDH*)  
19 and the small subunit 18S ribosomal RNA (*18S*). Three technical replicates were measured for each  
20 sample analyzed, and for each gene of interest. The statistical analysis was conducted with ordinary  
21 Two-way ANOVA with Dunnett's multiple comparison test, and individual variances computed for each  
22 comparison.

## 23 **6. Immunofluorescence analysis**

24 *6.1 Fixation and staining.* Cells grown in 2D cultures were fixed in 4% cold paraformaldehyde (PFA,  
25 Sigma) for 20 minutes at RT. Tissues from native specimens and hiTEVs were embedded unfixed in  
26 OCT matrix (Tissue-Tek) and transferred onto dry ice to allow water-soluble glycols and resins to  
27 solidify. Hence, the samples were processed in a cryostat (Tissue-Tek) and cut in slices of 5  $\mu$ m  
28 thickness. For the immunofluorescence staining, cells and tissue sections were washed twice in PBS,

1 followed by permeabilization with 0.2% Triton-X 100 (Sigma) in 1× PBS for 10 min RT, and blocked in  
2 1%BSA (Sigma), 0.1% Tween-20 (Sigma) in 1× PBS for 20 min RT. Next, the cells were incubated with  
3 the primary antibody for 1h at 37 °C, washed three times in 1× PBS, and stained with secondary  
4 antibodies for 1h at 37 °C. The specifications concerning the antibodies used for IF are summarized in  
5 the [Supplementary Table5](#). After secondary antibody staining, the samples were washed three times in  
6 PBS, counterstained with DAPI 0.2 µg/ml (Sigma) and mounted in Vectaschield (Vector Laboratories).

7

8 *6.2 Confocal microscope imaging and analysis.* The stained specimens were analysed with a confocal  
9 microscope (Leica TCS SP8) where images were acquired as z-stacks. The acquisition speed was set  
10 to 400 Hz, and the picture size to 1024 × 1024 pixels. Each acquired image of the z-stack composite  
11 was the result of an average of 10 frames from the same region. The data were then processed using  
12 the software Fiji (Version 1.52p Java 1.8.0\_172 64-bit). The z-stacks from individual positions within  
13 the 2D cell culture or 3D tissue were summarized in one image collecting the maximum intensity voxels  
14 from the different focal planes. Each acquired channel was singularly processed as described in the  
15 previous sentence and a composite image was created as a merged version of the channels of interest.

16

## 17 **7. Flow-cytometry**

18 *7.1 Generation of single cell suspensions from tissue-culture vessels, human tissue and control*  
19 *samples.* Native vessels and TEVs were cut into small pieces of about 1mm × 1mm, collected into small  
20 1.5 tubes (Eppendorf) and digested at 1.200 rpm in a tube shaker (Eppendorf) in a solution with 1 mg/ml  
21 collagenase/dispase, and 0.5 mg/ml Dnase in 1 × HBSS with Ca<sup>2+</sup> and Mg<sup>2+</sup> (Gibco) for 30 min at 37  
22 °C. Single-cell suspensions were filtered through 70 µm nylon meshes (BD Biosciences) and washed  
23 in HBSS. Frozen peripheral blood mononuclear cells (PBMCs) isolated from donor blood samples  
24 provided by the Zurich Blood Bank (Blutspende Zürich, project Nr.6676) were used as control samples,  
25 together with pooled macrophage precursors from HPSI0114i-eipl\_1 and WTB6 factories. 2D  
26 monocultures of HUVECs and HUVMF were also used as controls and were thawed at 37°C and  
27 washed twice in PBS at RT before further processing.

28

1 *7.2 Atheroma signature cell population processing, antibody panel and acquisition.* Single-cell  
2 suspensions were incubated for 30 min at 4 °C in Zombie Aqua live/dead exclusion dye in HBSS without  
3 Mg<sup>2+</sup> and Ca<sup>2+</sup> (LIVE/DEAD™ Fixable Aqua Dead Cell Stain Kit, Molecular Probes, Thermo Scientific).  
4 Next, cells were washed in FACS buffer prepared with 2% (v/v) heat-inactivated FBS, 5 mM EDTA,  
5 0.01% (v/v) NaN<sub>3</sub> (Sigma) and resuspended in Fc receptor-blocking antibodies (1:20 from stock in  
6 FACS buffer, anti-mouse CD16/32 TruStain fcX, Biolegend). After 5 min incubation, cells were treated  
7 with antibody master mix for surface marker staining and incubated for 15 min at 4 °C, followed by a  
8 last wash in FACS buffer. For identifying atheroma signature cell populations, we a panel of fluorophore-  
9 conjugated antibodies against targeted surface markers ([Supplementary Table5](#)). For intracellular  
10 staining, cells were fixed and permeabilized according to manufacturer's instructions  
11 (Fixation/Permeabilization and Permeabilization Buffer, eBioscience, Thermo Scientific). Cells were  
12 incubated with antibody master mix in 1x Permeabilization buffer for 30 min at 4 °C and incubated with  
13 AlexaFluor647 anti-αSMA. Fluorescence-minus-one (FMO) samples were included as negative  
14 controls. Cells were acquired on a 16-channel LSR II Fortessa flow cytometer (BD Biosciences).

15

16 *7.3 Data cleaning.* Via FlowJo (Version 10.0.8, FLOWJO LLC) software, the forward and side scatter  
17 signal of every sample was used to exclude any low-size debris and cell-doublers. Furthermore, Zombie  
18 Aqua live/dead exclusion dye-positive dead cells were removed. For follow-up analyses we pre-  
19 selected all living cells.

20

21 *7.4 Data normalization, visualization and automated clustering.* Living-cell data was normalized via  
22 Gaussian Normalization Function in R (gaussNorm, version 3.6.1, R Core Team) implemented in  
23 RStudio user interface (version 1.1.447, RStudio, Inc.). Using the viSNE function of the online database  
24 Cytobank (<https://cytobank.org/cytobank>, Cytobank, Beckman Coulter), the multiparameter n-  
25 dimensional data was processed by nonlinear dimensionality reduction tSNE algorithm (t-distributed  
26 stochastic neighbor embedding algorithm)<sup>49</sup>, in order to visualize cell populations in a two-dimensional  
27 space, called viSNE plot (settings: 2500 iterations, 30 perplexity). In order to increase sample size for  
28 better visualization in viSNE plots, we concatenated all samples of each experimental group a priori via  
29 flowCore (R package version 1.44.2, DOI: 10.18129/B9.bioc.flowCore) and Premessa (R package

1 version 0.2.4, <https://github.com/ParkerICI/premessa>). Automated, unsupervised cell subpopulation  
2 clustering was obtained by FlowSOM (self-organizing maps for flow data) analysis, using the  
3 hierarchical consensus clustering method (settings: 10 metaclusters, 10 iterations) of Cytobank  
4 (<https://cytobank.org/cytobank>, Cytobank, Beckman Coulter). The automatically identified clusters  
5 were overlaid with their corresponding cell events in the viSNE plots, quantified and exported for  
6 statistical analysis.

7

## 8 **8. Tissue engineering of small-caliber tissue engineered arteries**

9 *8.1. Tissue engineering, microfluidic device and bioreactor setup.* Non-woven polyglycolic acid (PGA)  
10 meshes (thickness 1 mm; specific gravity 70 mg/cm<sup>3</sup>; Cellon) were coated with 1.75% poly-4-  
11 hydroxybutyrate (P4HB; TEPHA, Inc., USA) by dipping into a tetrahydrofuran (THF) solution (Sigma)  
12 as previously done<sup>50</sup>. After solvent evaporation and overnight drying, the scaffolds were shaped as  
13 small conduits of length 1.5 cm with an inner diameter of 500  $\mu$ m. 48h before cell seeding the constructs  
14 were placed into 80% EtOH (Sigma) for 30 min, washed twice in 1 $\times$  PBS and incubated in SMC medium  
15 (See *Materials and Methods section 2.2*) overnight to facilitate cell adherence. First, we seeded iSMCs  
16 onto fully the biodegradable PGA/P4HB tubular-shaped conduits. We used a fibrin hydrogel carrier to  
17 maximize cell retention in the scaffold mesh, and we then cultured the seeded constructs using a series  
18 of fluid dynamic stimuli including both static and dynamic culture for a total of 2 weeks. In detail, iSMCs  
19 were seeded within the PGA tubular scaffolds at a seeding density of  $6 \times 10^6$  cells/cm<sup>2</sup> in a seeding  
20 volume of about 1.5 ml/vessel. Solutions of 750  $\mu$ l of fibrinogen (Sigma) (10 mg/ml of active protein)  
21 and 750  $\mu$ l thrombin (5U/ml) (Sigma) were prepared, and iSMCs were resuspended in the fibrinogen-  
22 thrombin mix and distributed both in the inner lumen and the outer surface. After a waiting time of 10  
23 min, when hydrogel crosslinking occurred, the seeded constructs were moved in iSMC medium  
24 enriched with 0.9 mM of l-ascorbic acid-2-phosphate (Sigma) (Day 0). At day 2 the medium was  
25 replaced with plain iSMC medium and the constructs were maintained in static culture until day 7. At  
26 day 7, tissue engineered constructs were moved into the fluidic devices connected to a bioreactor  
27 system and maintained under pulsatile flow (physiological-like flow rate 10 ml/min) to induce a  
28 mechanical stimulation of the tissue in culture (dynamic culturing). Second, we coated the inner lumen



1 of the conduits with iECs followed by 2 additional weeks of culture, for a total tissue-engineering period  
2 of 1 month. In detail, at day 14, iECs were seeded into the lumen of hiTEVs at the seeding density of  
3  $0.5 \times 10^6$  cells/cm<sup>2</sup> in a seeding volume of 100  $\mu$ l. The vessels were then carefully rotated to allow for  
4 even seeding throughout the luminal surface. Henceforth, the hiTEVs were kept in static culture in a  
5 culturing medium prepared as follows:  $\frac{1}{2}$  iSMCs medium and  $\frac{1}{2}$  iECs medium for 7 days, and then  
6 moved to dynamic culture at day 21 till day 28, when disease modeling begun. The fluidic device used  
7 for dynamic culturing and later for disease modeling was built at the department of physics of the ETH  
8 Zurich (ETHZ, Switzerland) through computer numerical control (CNC) guided milling of aluminum and  
9 poly methyl methacrylate (PMMA) and silicon (VMQ) and was designed to host the simultaneous culture  
10 of 16 hiTEVs. The components of the fluidic device were disassembled, thoroughly cleaned, washed in  
11 EthOH 80% overnight and sterilized under UV light for 2h before culturing.

12

13 *8.2. Disease modeling in vitro.* At day 28, the hiTEVs were perfused with syngeneic iMPs from 2 weeks-  
14 old iMP-factories. The culturing medium was prepared as follows:  $\frac{1}{3}$  iSMCs medium,  $\frac{1}{3}$  iECs medium  
15 and  $\frac{1}{3}$  iMPs medium. The medium was changed every 3 days and at each medium change 500.000  
16 iMPs/ml were added alongside with LDL, ApoB100 190 mg/dl (LeeBio) in a final volume of 50 ml. The  
17 disease modeling time continued for 28 additional days (4 weeks). At the end of the disease modeling  
18 time, hiTEVs could be easily harvested for further processing.

19

## 20 **9. CFD modeling**

21 *9.1 CAD modeling and mesh creation.* A computer-aided design model (CAD) of the components of the  
22 fluidic device was generated using Autodesk Fusion 360. The Standard Tessellation Language file  
23 (STL) was exported into STAR-CCM+ for mesh rendering. Briefly, the model was imported into 3D CAD  
24 and used to create a CAD imprint operation. The inner volume of the device was extracted via seed  
25 point and assigned to the region. To increase mesh resolution all boundaries were split into separate  
26 entities to make it easier to control the resolution of each separate group of surfaces. Hence, the  
27 obstacles were merged to allow targeted surface control on the mesh resolution. The flow within the  
28 device was resolved using flow rate of 10 ml/min (velocity of 0.024 m/s) and a fluid density of 999kg/m<sup>3</sup>,



1 with a dynamic viscosity of  $7.8 \times 10^{-4}$  Pa·s. To verify the reliability of our model, we resolved a second  
2 case, with a set velocity at the inlet of 0.1 m/s.

3

4 *9.2 Atherosclerosis modeling in silico.* To model the behaviour of LDL particles within the device we  
5 used the Navier-Stokes equations and considered LDL as passive scalar with a diffusion coefficient  
6 determined by the Stokes-Einstein equations. The Stokes-Einstein equations aim at modeling the  
7 diffusion of particles undergoing Brownian motion in a fluid at uniform temperature, and at relating the  
8 particle diameter to their diffusion and hence the Schmidt number (ratio of scalar diffusivity to viscous  
9 diffusion). All was discretized using unstructured finite-volume. The mass flow inlet generated a flux of  
10 LDL into the device, and subsequently produced downstream fluxes on the vessels surfaces. LDL  
11 particles were considered as weakly negatively buoyant and, for modeling purposes, was provided at  
12 an inlet concentration of 190 mg/dl (or  $1.9 \times 10^{-3}$  g/ml) with a mass of  $4.98159 \times 10^{-21}$ kg and a density  
13 of  $480.3029$  kg/m<sup>3</sup>. Hence, we performed a one-way coupling where only the flow influences particles  
14 and not vice versa. We instructed the code to sample impact and to register and remove the LDL  
15 particles when hitting a solid surface (e.g., the inner vessel lumen), to not influence any subsequent  
16 impact. We measured that about 1.8% of the overall LDL perfused at the inlet remained within device  
17 after each iteration. In our calculations, we considered the flow as a steady state and the occurrence of  
18 nine medium changes, one every three days of culture, for a total of twenty-eight days of modeling. We  
19 predicted that at every medium change, after about 30 min (1427 cycles) all the perfused LDL would  
20 be retained within the device and that every three days of culturing, the inner vessel surface growth  
21 would be of about  $0.143 \mu\text{m}$  and at the end of the four weeks of modeling would be of  $1.05 \mu\text{m}$ . To  
22 estimate the accumulated particles within the vessels (growth) we measured the flux of the passive  
23 scalar. In detail, we multiplied the mass flow rate with time to obtain information on the magnitude of  
24 the mass flow ( $m = \text{kg/m}^2$ ), and the putative surface growth rate. Knowing the density of the particles ( $\rho$ )  
25 we could then infer the surface growth ( $\Delta x = m / \rho$ ). Importantly, the growth rate depends linearly on the  
26 concentration at the inlet.

27

28

29

## 1 **10. FnBPA5 peptide treatment**

2 *10.1 FnBPA5 preparation.* The FnBPA5 peptides were commercially synthesized and HPLC-purified  
3 (Peptide Specialty Laboratories GmbH, Heidelberg, Germany, or Pichem GmbH, Graz, Austria). A  
4 spacer consisting of three glycine and one cysteine residue at the N-terminus of the original peptide  
5 sequence from *S. aureus* was introduced. The cysteine was introduced for further modifications with  
6 fluorescent dye (Cy5). Lyophilized peptides were dissolved in water (TraceSELECT quality, Sigma) with  
7 10% Dimethylformamide (DMF, Sigma) and stored at  $-20^{\circ}\text{C}$  for further usage.

8

### 9 *10.2 FnBPA5 staining of histological tissue sections and data analysis*

10 For immunohistochemistry freshly dissected arteries were embedded in OTC matrix, frozen on dry-ice,  
11 and cut into 20  $\mu\text{m}$  sections. Non-fixed cryo-sectioned tissues were thawed, rinsed with PBS to remove  
12 all the soluble components, blocked for 30 min with 5% BSA in PBS and incubated for 60 min with  
13 5  $\mu\text{g}/\text{ml}$  FnBPA5-Cy5. After one washing step the tissues were fixed in 4% PFA in PBS for 10 min.  
14 Samples were blocked in PBS with 5% BSA for 30 min and incubated with polyclonal rabbit anti-  
15 fibronectin antibody ([Supplementary Table5](#)). The primary antibody solution was removed, and samples  
16 were washed before incubation with secondary goat anti-rabbit AlexaFluor546 ([Supplementary Table5](#))  
17 antibody solution for 45 min. After a washing step in PBS, samples were mounted using Prolong  
18 Antifade Gold with DAPI (Invitrogen). The image was acquired using an Olympus FV1000 confocal  
19 microscope equipped with a 10 $\times$  air or 40 $\times$  water objective. Whole tissue sections were visualized by  
20 stitching together individual fields of view using the grid/collection stitching plugin in Fiji. For image  
21 analysis at least 30 images per condition from 3 samples were analyzed for pixel-by-pixel signal  
22 intensity of Fn and FnBPA5 and graphed without further normalization. The microscope settings were  
23 kept unaltered during image acquisition for comparative analysis of signal intensity.

24

## 25 **11. Statistics**

26 A detailed description of the sample size, statistical test and correction used is reported at each specific  
27 methodological section. Data central tendency is generally indicated as mean, and the variation from  
28 the central tendency as standard deviation, unless specified differently. We accounted for inter-donor

1 and inter-cell line variability by setting the false discovery rate to 0.1 (90% confidence interval). All the  
2 statistical analyses were performed on GraphPad Prism (Version 9.0, GraphPad Software).

3

#### 4 **Acknowledgments**

5 AM was supported by the 3R Research Foundation Switzerland (3R-Project 135-13), by the Start-up  
6 grant from the Center for Applied Biology and Molecular Medicine (CABMM) of the University of Zurich,  
7 and by a Spark grant from the Swiss National Science Foundation (SNSF, CRSK-3\_190579/1). AM  
8 acknowledges Stephanie Davaz for the technical help in culturing and characterizing iECs and iSMCs,  
9 and Dr. Emanuela Fioretta for the insightful scientific exchanges. WH was supported by a SNSF  
10 Sinergia grant (177195) and a pilot grant of the *Oxford – McGill – Zurich* Partnership in Neuroscience.

11

#### 12 **Author Contributions**

13 AM conceptualized the experiments, designed the model and the microfluidic device components under  
14 BW and SPH supervision. AM differentiated and characterized hiPSCs and performed the tissue  
15 engineering experiments. CG and AM performed the flow cytometry experiments and analyzed the  
16 results. VH and VV provided the FnBPA5 peptide. VH, and AM stained, acquired, and analyzed the  
17 samples. KC and JHW developed the CFD model. WH and AM differentiated hiPSCs into iMPs and  
18 maintained the iMPs factories for the experiments. WH performed LDL-uptake assays. AVE, BW, AM,  
19 and SPH obtained fundings for the experiments. AM wrote the manuscript with the help of CG, WH,  
20 VH, and MYE. All the co-authors contributed to the final version of the manuscript.

21

#### 22 **Competing Interest statement**

23 The authors declare no competing interests.

24

#### 25 **Data availability**

26 The authors declare that all data supporting the findings of this study are available within the article and  
27 its supplementary material files, or from the corresponding authors upon reasonable request.

## References

### Introducing atherosclerosis

- 1 Libby, P. *et al.* Atherosclerosis. *Nat Rev Dis Primers* **5**, 56, doi:10.1038/s41572-019-0106-z (2019).
- 2 Binder, C. J. *et al.* The year 2019 in Atherosclerosis. *Atherosclerosis* **299**, 67-75, doi:10.1016/j.atherosclerosis.2020.03.018 (2020).
- 3 Williams, K. J. & Tabas, I. The response-to-retention hypothesis of early atherogenesis. *Arterioscler Thromb Vasc Biol* **15**, 551-561, doi:10.1161/01.atv.15.5.551 (1995).
- 4 Bentzon, J. F., Otsuka, F., Virmani, R. & Falk, E. Mechanisms of plaque formation and rupture. *Circ Res* **114**, 1852-1866, doi:10.1161/circresaha.114.302721 (2014).

### Risk factors: dyslipidemia and other co-morbidities

- 5 Borén, J. *et al.* Low-density lipoproteins cause atherosclerotic cardiovascular disease: pathophysiological, genetic, and therapeutic insights: a consensus statement from the European Atherosclerosis Society Consensus Panel. *Eur Heart J* **41**, 2313-2330, doi:10.1093/eurheartj/ehz962 (2020).
- 6 Chait, A. & Bornfeldt, K. E. Diabetes and atherosclerosis: is there a role for hyperglycemia? *J Lipid Res* **50 Suppl**, S335-339, doi:10.1194/jlr.R800059-JLR200 (2009).
- 7 von Eckardstein, A., Nofer, J. R. & Assmann, G. High density lipoproteins and arteriosclerosis. Role of cholesterol efflux and reverse cholesterol transport. *Arterioscler Thromb Vasc Biol* **21**, 13-27, doi:10.1161/01.atv.21.1.13 (2001).
- 8 Mundi, S. *et al.* Endothelial permeability, LDL deposition, and cardiovascular risk factors—a review. *Cardiovasc Res* **114**, 35-52, doi:10.1093/cvr/cvx226 (2018).

### Hemodynamics in atherosclerosis

- 9 Humphrey, J. D. Mechanisms of arterial remodeling in hypertension: coupled roles of wall shear and intramural stress. *Hypertension* **52**, 195-200, doi:10.1161/HYPERTENSIONAHA.107.103440 (2008).
- 10 Chiu, J. J. & Chien, S. Effects of disturbed flow on vascular endothelium: pathophysiological basis and clinical perspectives. *Physiol Rev* **91**, 327-387, doi:10.1152/physrev.00047.2009 (2011).
- 11 Collins, C. *et al.* Haemodynamic and extracellular matrix cues regulate the mechanical phenotype and stiffness of aortic endothelial cells. *Nat Commun* **5**, 3984, doi:10.1038/ncomms4984 (2014).
- 12 Hahn, C. & Schwartz, M. A. The role of cellular adaptation to mechanical forces in atherosclerosis. *Arterioscler Thromb Vasc Biol* **28**, 2101-2107, doi:10.1161/atvbaha.108.165951 (2008).
- 13 Malek, A. M., Alper, S. L. & Izumo, S. Hemodynamic shear stress and its role in atherosclerosis. *JAMA* **282**, 2035-2042, doi:10.1001/jama.282.21.2035 (1999).
- 14 Kwak, B. R. *et al.* Biomechanical factors in atherosclerosis: mechanisms and clinical implications. *Eur Heart J* **35**, 3013-3020, 3020a-3020d, doi:10.1093/eurheartj/ehu353 (2014).
- 15 Caro, C. G., Fitz-Gerald, J. M. & Schroter, R. C. Arterial wall shear and distribution of early atheroma in man. *Nature* **223**, 1159-1160, doi:10.1038/2231159a0 (1969).
- 16 Liu, B. & Tang, D. Computer simulations of atherosclerotic plaque growth in coronary arteries. *Mol Cell Biomech* **7**, 193-202 (2010).

### In vitro and in vivo disease modeling

- 17 Doran, A. C., Meller, N. & McNamara, C. A. Role of smooth muscle cells in the initiation and early progression of atherosclerosis. *Arterioscler Thromb Vasc Biol* **28**, 812-819, doi:10.1161/atvbaha.107.159327 (2008).
- 18 Kiener, P. A. *et al.* Immune complexes of LDL induce atherogenic responses in human monocyte cells. *Arterioscler Thromb Vasc Biol* **15**, 990-999, doi:10.1161/01.atv.15.7.990 (1995).
- 19 Robert, J. *et al.* A three-dimensional engineered artery model for in vitro atherosclerosis research. *PLoS One* **8**, e79821, doi:10.1371/journal.pone.0079821 (2013).
- 20 Hosseini, V. *et al.* A Pulsatile Flow System to Engineer Aneurysm and Atherosclerosis Mimetic Extracellular Matrix. *Adv Sci (Weinh)* **7**, 2000173, doi:10.1002/advs.202000173 (2020).
- 21 Mallone, A., Stenger, C., Von Eckardstein, A., Hoerstrup, S. P. & Weber, B. Biofabricating atherosclerotic plaques: In vitro engineering of a three-dimensional human fibroatheroma model. *Biomaterials* **150**, 49-59, doi:10.1016/j.biomaterials.2017.09.034 (2018).
- 22 Deguchi, J. O. *et al.* Inflammation in atherosclerosis: visualizing matrix metalloproteinase action in macrophages in vivo. *Circulation* **114**, 55-62, doi:10.1161/CIRCULATIONAHA.106.619056 (2006).
- 23 Getz, G. S. & Reardon, C. A. Use of Mouse Models in Atherosclerosis Research. *Methods Mol Biol* **1339**, 1-16, doi:10.1007/978-1-4939-2929-0\_1 (2015).
- 24 Fan, J. *et al.* Rabbit models for the study of human atherosclerosis: from pathophysiological mechanisms to translational medicine. *Pharmacol Ther* **146**, 104-119, doi:10.1016/j.pharmthera.2014.09.009 (2015).
- 25 Shim, J., Al-Mashhadi, R. H., Sorensen, C. B. & Bentzon, J. F. Large animal models of atherosclerosis—new tools for persistent problems in cardiovascular medicine. *J Pathol* **238**, 257-266, doi:10.1002/path.4646 (2016).

### Fibronectin in mechanically-challenged, low-strain biosystems

- 26 Kubow, K. E. *et al.* Mechanical forces regulate the interactions of fibronectin and collagen I in extracellular matrix. *Nat Commun* **6**, 8026, doi:10.1038/ncomms9026 (2015).
- 27 Arnoldini, S. *et al.* Novel peptide probes to assess the tensional state of fibronectin fibers in cancer. *Nat Commun* **8**, 1793, doi:10.1038/s41467-017-01846-0 (2017).

### Articles on iPSCs that inspired our methods and experimental approach

- 28 Generali, M. *et al.* Autologous endothelialized small-caliber vascular grafts engineered from blood-derived induced pluripotent stem cells. *Acta Biomater* **97**, 333-343, doi:10.1016/j.actbio.2019.07.032 (2019).
- 29 Viola, V. & Caleb, W. (The Company of Biologists Ltd, DMM, 2020).
- 30 Chang, W. G. & Niklason, L. E. A short discourse on vascular tissue engineering. *NPJ Regen Med* **2**, doi:10.1038/s41536-017-0011-6 (2017).
- 31 van Wilgenburg, B., Browne, C., Vowles, J. & Cowley, S. A. Efficient, long term production of monocyte-derived macrophages from human pluripotent stem cells under partly-defined and fully-defined conditions. *PLoS One* **8**, e71098, doi:10.1371/journal.pone.0071098 (2013).
- 32 Haenseler, W. *et al.* Excess alpha-synuclein compromises phagocytosis in iPSC-derived macrophages. *Sci Rep* **7**, 9003, doi:10.1038/s41598-017-09362-3 (2017).

### Inflammation and atherosclerosis - the role of innate immunity in the atherosclerosis ecosystem

- 33 Koltsova, E. K. & Ley, K. How dendritic cells shape atherosclerosis. *Trends Immunol* **32**, 540-547, doi:10.1016/j.it.2011.07.001 (2011).
- 34 Cybulsky, M. I., Cheong, C. & Robbins, C. S. Macrophages and Dendritic Cells: Partners in Atherogenesis. *Circ Res* **118**, 637-652, doi:10.1161/circresaha.115.306542 (2016).
- 35 Moore, K. J., Sheedy, F. J. & Fisher, E. A. Macrophages in atherosclerosis: a dynamic balance. *Nat Rev Immunol* **13**, 709-721, doi:10.1038/nri3520 (2013).
- 36 Quintar, A. *et al.* Endothelial Protective Monocyte Patrolling in Large Arteries Intensified by Western Diet and Atherosclerosis. *Circ Res* **120**, 1789-1799, doi:10.1161/CIRCRESAHA.117.310739 (2017).
- 37 Wolf, D. & Ley, K. Immunity and Inflammation in Atherosclerosis. *Circ Res* **124**, 315-327, doi:10.1161/circresaha.118.313591 (2019).
- 38 Fernandez, D. M. *et al.* Single-cell immune landscape of human atherosclerotic plaques. *Nat Med* **25**, 1576-1588, doi:10.1038/s41591-019-0590-4 (2019).
- 39 Maurice, P. *et al.* Elastin fragmentation and atherosclerosis progression: the elastokine concept. *Trends Cardiovasc Med* **23**, 211-221, doi:10.1016/j.tcm.2012.12.004 (2013).
- 40 Di Gregoli, K. *et al.* MicroRNA-181b Controls Atherosclerosis and Aneurysms Through Regulation of TIMP-3 and Elastin. *Circ Res* **120**, 49-65, doi:10.1161/CIRCRESAHA.116.309321 (2017).

### Atherosclerosis in young and elderly

- 41 Milei, J. *et al.* Perinatal and infant early atherosclerotic coronary lesions. *Can J Cardiol* **24**, 137-141, doi:10.1016/s0828-282x(08)70570-1 (2008).
- 42 Hong, Y. M. Atherosclerotic cardiovascular disease beginning in childhood. *Korean Circ J* **40**, 1-9, doi:10.4070/kcj.2010.40.1.1 (2010).
- 43 Johnson, A. M. *et al.* Military combat and burden of subclinical atherosclerosis in middle aged men: the ARIC study. *Prev Med* **50**, 277-281, doi:10.1016/j.ypmed.2010.02.009 (2010).
- 44 Hansen, T., Wikström, J., Johansson, L. O., Lind, L. & Ahlström, H. The prevalence and quantification of atherosclerosis in an elderly population assessed by whole-body magnetic resonance angiography. *Arterioscler Thromb Vasc Biol* **27**, 649-654, doi:10.1161/01.ATV.0000255310.47940.3b (2007).

### Adaptive immunity in atherosclerosis

- 45 Ammirati, E., Moroni, F., Magnoni, M. & Camici, P. G. The role of T and B cells in human atherosclerosis and atherothrombosis. *Clin Exp Immunol* **179**, 173-187, doi:10.1111/cei.12477 (2015).

### Papers that inspired our methodological approach and project design

- 46 Emmert, M. Y. *et al.* Computational modeling guides tissue-engineered heart valve design for long-term in vivo performance in a translational sheep model. *Sci Transl Med* **10**, doi:10.1126/scitranslmed.aan4587 (2018).
- 47 Ikuno, T. *et al.* Efficient and robust differentiation of endothelial cells from human induced pluripotent stem cells via lineage control with VEGF and cyclic AMP. *PLoS One* **12**, e0173271, doi:10.1371/journal.pone.0173271 (2017).
- 48 Yang, L. *et al.* Differentiation of Human Induced-Pluripotent Stem Cells into Smooth-Muscle Cells: Two Novel Protocols. *PLoS One* **11**, e0147155, doi:10.1371/journal.pone.0147155 (2016).
- 49 Amir el, A. D. *et al.* viSNE enables visualization of high dimensional single-cell data and reveals phenotypic heterogeneity of leukemia. *Nat Biotechnol* **31**, 545-552, doi:10.1038/nbt.2594 (2013).
- 50 Hoerstrup, S. P. *et al.* Tissue engineering of functional trileaflet heart valves from human marrow stromal cells. *Circulation* **106**, 1143-1150 (2002).
